# Supplementary material for: Patchouli alcohol suppresses castration-resistant prostate cancer progression by inhibiting NF-κB signal pathways
Source: PubMed Central journal article supplement — Transl Androl Urol. 2022 Apr;11(4):528–42. doi: 10.21037/tau-22-220 (PMC9085927; doi:10.21037/tau-22-220), 2022-04
Supplement: tau-11-04-528-dss.pdf [file tau-11-04-528-dss.pdf]

## Data Sharing Statement

|                     |                                                                                                                                                     |                                                                                                                  |
|---------------------|-----------------------------------------------------------------------------------------------------------------------------------------------------|------------------------------------------------------------------------------------------------------------------|
| <b>Article Info</b> | <a href="https://dx.doi.org/10.21037/tau-22-220">https://dx.doi.org/10.21037/tau-22-220</a>                                                         |                                                                                                                  |
| <b>Item</b>         | <b>Question</b>                                                                                                                                     | <b>Authors' Response<br/>(place "-" if not applicable)</b>                                                       |
| 1                   | Would you like to share data collected for your study to others?                                                                                    | Yes.                                                                                                             |
| 2                   | If not, would you like to share the reason for your decision?                                                                                       | -                                                                                                                |
| 3                   | What data in particular will be shared?                                                                                                             | All data.                                                                                                        |
| 4                   | Any other documents will be shared? Such as study protocol, statistical analysis plan, informed consent form, clinical study report, analytic code. | If required, statistical analysis plans will also be shared.                                                     |
| 5                   | When will data availability begin?                                                                                                                  | From the publication date.                                                                                       |
| 6                   | When will data availability end?                                                                                                                    | 1 year within the publication date, since the technique or survival data may be updated over time.               |
| 7                   | To whom will you share the data?                                                                                                                    | Medical and scientific researchers in related fields.                                                            |
| 8                   | For what type of analysis or purpose?                                                                                                               | Evaluation and analysis of castration-resistant prostate cancer progression.                                     |
| 9                   | How or where can the data/documents be obtained?                                                                                                    | Emails could be sent to corresponding author.                                                                    |
| 10                  | Any other restrictions?                                                                                                                             | We may balance the potential benefits and risks for each request and then provide the data that could be shared. |
